# Supplementary material
Source: Springer Nature journal article supplement (https://www.springermedizin.de/resource/supplementary/13058_2005_1270_MOESM9_ESM.pdf/9698718)

Figure 4

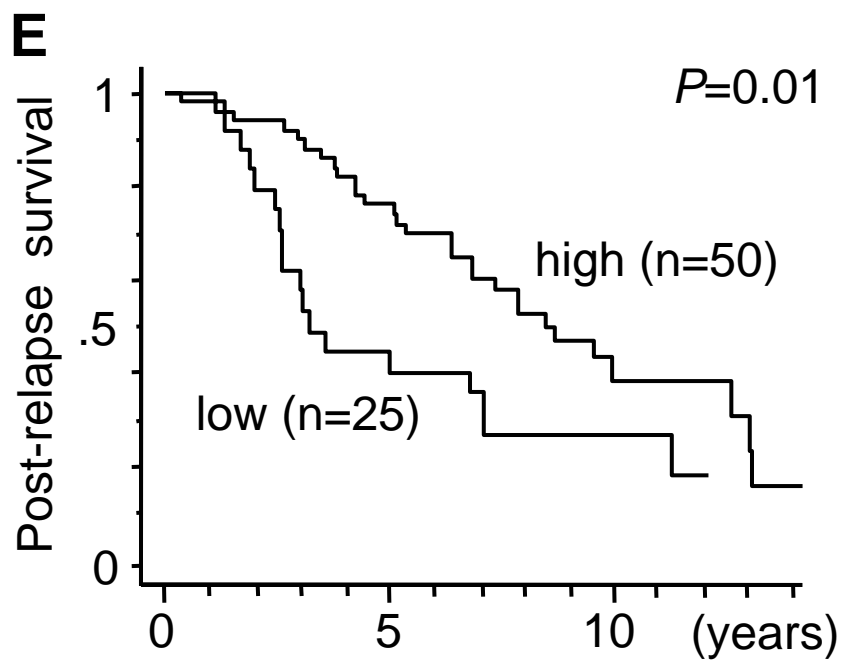

Supplement: MOESM9 [file 9698718]
